# Supplementary material
Source: PubMed Central journal article supplement (PMC5394859)

## The prognostic value of serum C-reactive protein, ferritin, and albumin prior to allogeneic transplantation for acute myeloid leukemia and myelodysplastic syndromes

Andrew S. Artz,<sup>1</sup> Brent Logan,<sup>2,3</sup> Xiaochun Zhu,<sup>2</sup> Gorgun Akpek,<sup>4</sup> Rodrigo Martino Bufarull,<sup>5</sup> Vikas Gupta,<sup>6</sup> Hillard M. Lazarus,<sup>7</sup> Mark Litzow,<sup>8</sup> Alison Loren,<sup>9</sup> Navneet S. Majhail,<sup>10</sup> Richard T. Maziarz,<sup>11</sup> Philip McCarthy,<sup>12</sup> Uday Papat,<sup>13</sup> Wael Saber,<sup>2</sup> Stephen Spellman,<sup>14</sup> Olle Ringden,<sup>15,16</sup> Amittha Wickrema,<sup>1</sup> Marcelo C. Pasquini,<sup>2</sup> and Kenneth R. Cooke<sup>17</sup> from the Center for International Blood and Marrow Transplantation Research

<sup>1</sup>Section of Hematology/Oncology, University of Chicago School of Medicine, IL, USA; <sup>2</sup>CIBMTR, (Center for International Blood and Marrow Transplant Research), Department of Medicine, Milwaukee, WI, USA; <sup>3</sup>Division of Biostatistics, Institute for Health and Society, Medical College of Wisconsin, Milwaukee, WI, USA; <sup>4</sup>Stem Cell Transplantation and Cellular Therapy Program, Banner MD Anderson Cancer Center, Gilbert, AZ, USA; <sup>5</sup>Division of Clinical Hematology, Hospital de la Santa Creu I Sant Pau, Barcelona, Spain; <sup>6</sup>Blood and Marrow Transplant Program, Princess Margaret Cancer Centre, University Health Network, Toronto, ON, Canada; <sup>7</sup>Seidman Cancer Center, University Hospitals Case Medical Center, Cleveland, OH, USA; <sup>8</sup>Division of Hematology and Transplant Center, Mayo Clinic Rochester, Minneapolis, MN, USA; <sup>9</sup>Division of Hematology/Oncology, Department of Medicine, Perelman School of Medicine at the University of Pennsylvania, Philadelphia, PA, USA; <sup>10</sup>Blood & Marrow Transplant Program, Cleveland Clinic Taussig Cancer Institute, OH, USA; <sup>11</sup>Adult Blood and Marrow Stem Cell Transplant Program, Knight Cancer Institute, Oregon Health and Science University, Portland, OR, USA; <sup>12</sup>Blood & Marrow Transplant Program, Department of Medicine, Roswell Park Cancer Institute, Buffalo, NY, USA; <sup>13</sup>MD Anderson Cancer Center, Houston, TX, USA; <sup>14</sup>CIBMTR (Center for International Blood and Marrow Transplant Research), National Marrow Donor Program/Be The Match, Minneapolis, MN, USA; <sup>15</sup>Division of Therapeutic Immunology, Department of Laboratory Medicine, Karolinska Institute, Stockholm, Sweden; <sup>16</sup>Centre for Allogeneic Stem Cell Transplantation, Stockholm, Sweden; and <sup>17</sup>Pediatric Blood and Marrow Transplant Program, The Sidney Kimmel Cancer Comprehensive Cancer Center at Johns Hopkins, Baltimore, MD, USA

©2016 Ferrata Storti Foundation. This is an open-access paper. doi:10.3324/haematol.2016.145847

Received: March 11, 2016.

Accepted: July 26, 2016.

Pre-published: August 4, 2016.

Correspondence: aartz@medicine.bsd.uchicago.edu

---

Supplemental Tables and Figures.

Supplemental table 1: Significant factors in multivariate analysis of transplant related mortality

| Factor                 | Abnormal,<br>N (%) | Transplant<br>related <u>mortality</u> |             |       |
|------------------------|--------------------|----------------------------------------|-------------|-------|
|                        |                    | HR                                     | 95% CI      | P     |
| <b>Biomarker Panel</b> |                    |                                        |             |       |
| Low (<1.5)             | 200                | 1.0                                    | -           | -     |
| Intermediate (1.5-2.0) | 331                | 1.66                                   | 1.10-2.49   | .015  |
| High (>2.0)            | 159                | 2.72                                   | 1.77-4.19   | <.001 |
| <b>Body mass index</b> |                    |                                        |             |       |
| < 22                   | 82                 | 1.0                                    |             | .001  |
| 22-29                  | 360                | 1.15                                   | 0.67 – 1.98 | .062  |
| 30-34                  | 153                | 1.24                                   | 0.69 – 2.24 | .47   |
| 35+                    | 94                 | 2.37                                   | 1.31 – 4.27 | .004  |
| <b>Disease</b>         |                    |                                        |             |       |
| AML                    | 556                | 1.0                                    |             |       |
| MDS                    | 134                | 2.01                                   | 1.41 – 2.89 | <.001 |
| <b>HLA match</b>       |                    |                                        |             |       |
| 8/8                    | 531                | 1.0                                    |             |       |
| 7/8                    | 159                | 1.8                                    | 1.3 – 2.5   | <.001 |
| <b>CMV status, D/R</b> |                    |                                        |             |       |
| -/-                    | 210                | 1.0                                    |             | .008  |
| +/+                    | 149                | 0.9                                    | 0.57 – 1.44 | .67   |
| +/-                    | 72                 | 1.17                                   | 0.67 – 2.03 | .59   |
| -/+                    | 242                | 1.65                                   | 1.14 – 2.40 | .008  |
| unknown                | 17                 | 2.49                                   | 1.03 – 6.02 | .044  |

Abbreviations: HLA: human leukocyte antigen, AML: acute myeloid leukemia, MDS: myelodysplastic syndromes, CMV: cytomegalovirus serologic status, D: donor, R: recipient

**Supplemental table 2: Number and proportion of deaths in the low, intermediate and high biomarker panel risk group.**

|                 | Biomarker Score |                            |                 |
|-----------------|-----------------|----------------------------|-----------------|
|                 | Low (<1.5) (%)  | Intermediate (1.5-2.0) (%) | High (>2.0) (%) |
| Primary disease | 43 (53)         | 78 (45)                    | 44 (35)         |
| New malignancy  | 1 (1)           | 1 (1)                      | 1 (1)           |
| GVHD            | 10 (12)         | 27 (16)                    | 13 (10)         |
| IPN             | 4 (5)           | 12 (7)                     | 9 (7)           |
| Infection       | 11 (14)         | 16 (9)                     | 19 (15)         |
| Organ failure   | 4 (5)           | 20 (12)                    | 18 (14)         |
| Others          | 6 (7)           | 15 (9)                     | 15 (12)         |
| Unknown         | 2 (2)           | 3 (2)                      | 6 (5)           |
| <b>Total</b>    | <b>81</b>       | <b>172</b>                 | <b>125</b>      |

**Supplemental Figure 1. Correlation of log transformed CRP by ELISA to automated chemistry values in an independent dataset from the study samples (n=80).**

**Supplemental Figure 2. Correlation of log transformed ferritin by ELISA to automated chemistry values in an independent dataset from the study samples (n=73)**

Supplemental Figure 1

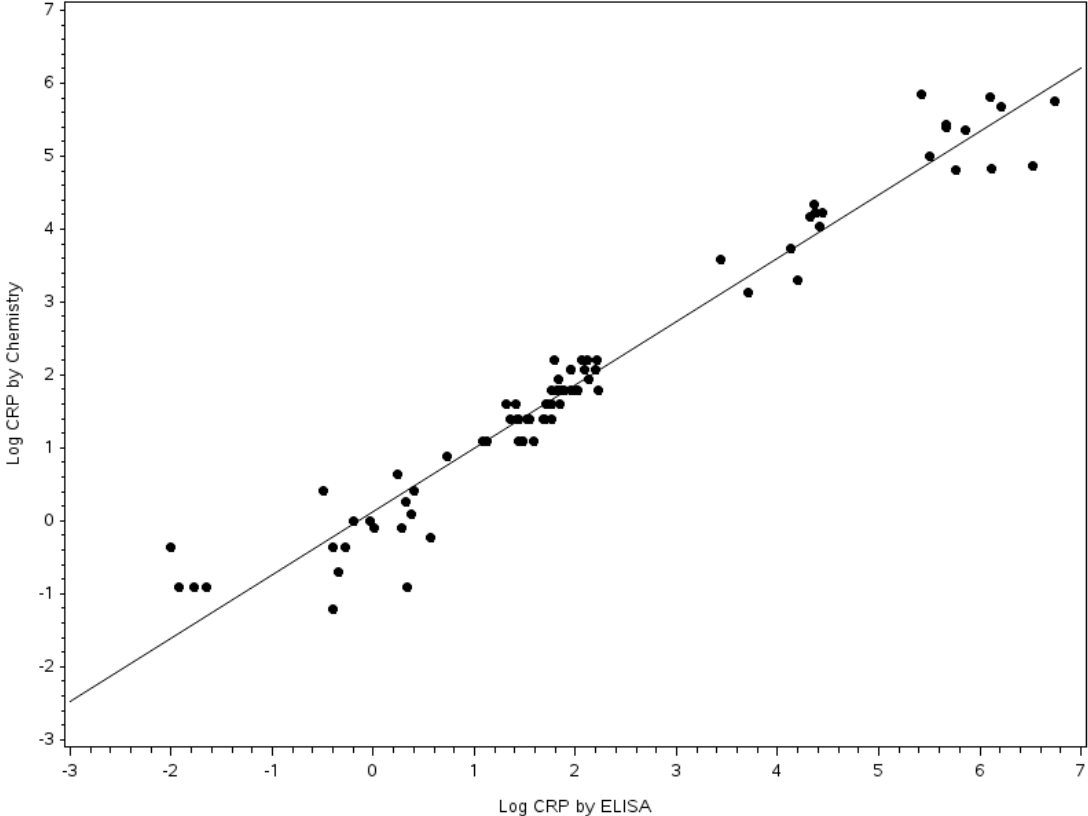

Supplemental Figure 2

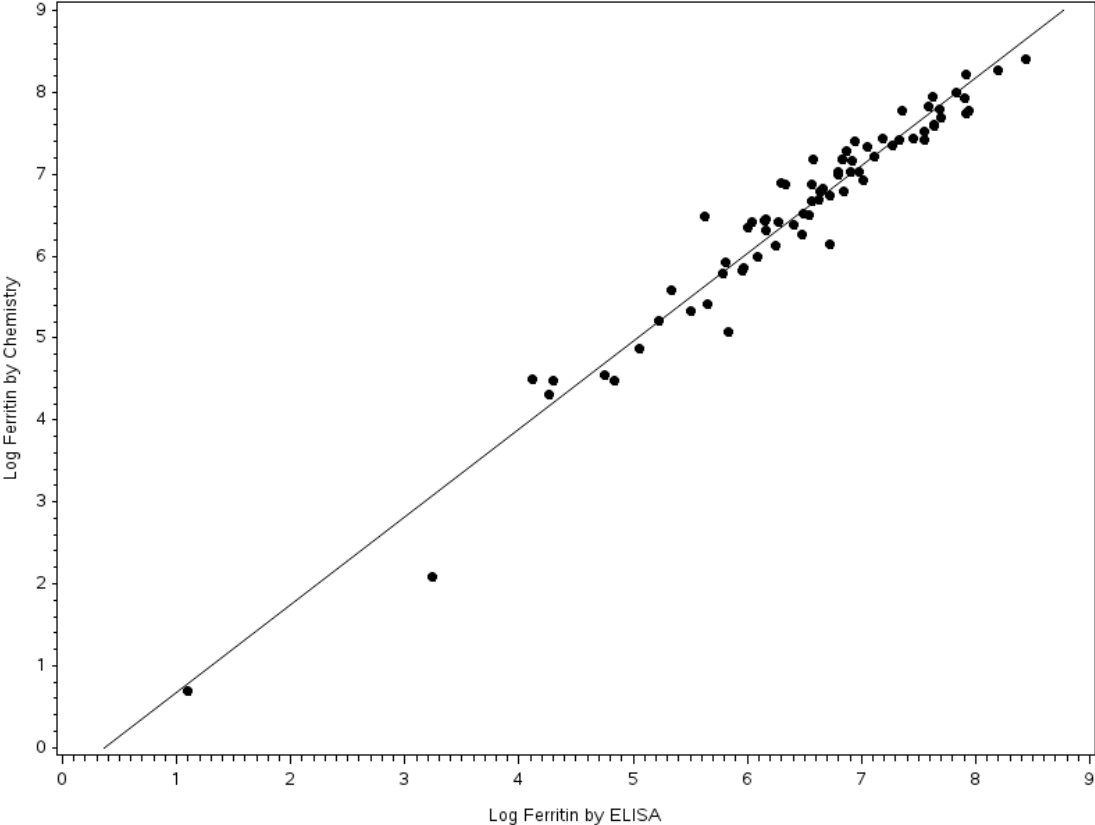

Supplement: 2016.145847.ARTZ_SUPPL.pdf [file 2016.145847.ARTZ_SUPPL.pdf]
